# Supplementary material for: Defining the content of a minimal dataset for acquired brain injury using a Delphi procedure
Source: Springer Nature journal article supplement (doi:10.1186/s12955-020-01286-3), 2020-02-17
Supplement: MOESM1 [file 17715834]

| Domains                                                                  | Yes (%) |         |
|--------------------------------------------------------------------------|---------|---------|
|                                                                          | Round 1 | Round 2 |
| <b>Disease characteristics</b>                                           |         |         |
| Injury characteristics                                                   | 95.3*   | 82.5*   |
| Comorbidity                                                              | 90.9*   | 75.0*   |
| <b>Body functions and structures</b>                                     |         |         |
| Cognitive functioning                                                    | 100.0*  | 97.5*   |
| Emotional functioning                                                    | 97.7*   | 87.5*   |
| Energy                                                                   | 86.4*   | 72.5*   |
| Sensory functioning                                                      | 66.7*   | 27.5    |
| Pain                                                                     | 60.5*   | 27.5    |
| Voice and Speech <sup>a</sup>                                            | -       | 17.5    |
| Movement-related functions <sup>b</sup>                                  | 91.2*   | -       |
| <b>Activities and participation</b>                                      |         |         |
| Participation (including domestic life, civil life and major life areas) | 97.6*   | 90.0*   |
| Communication                                                            | 88.4*   | 87.5*   |
| Mobility                                                                 | 91.7*   | 77.5*   |
| Self-care                                                                | 90.7*   | 75.0*   |
| <b>External factors</b>                                                  |         |         |
| Products and technology                                                  | 70.6*   | 25.0    |
| Services, systems and policies                                           | 71.1*   | 32.5    |
| Support                                                                  | 90.5*   | 75.0*   |
| Social network                                                           | NP      | 42.5    |
| <b>Personal factors</b>                                                  |         |         |
| Demographic factors                                                      | 90.5*   | 82.5*   |
| Coping style                                                             | 78.6*   | 47.5    |
| Education <sup>a</sup>                                                   | -       | 45.0    |
| Religion <sup>a</sup>                                                    | -       | 20.0    |
| <b>Other</b>                                                             |         |         |
| Quality of life                                                          | 90.9*   | 77.5*   |

Note. \*=reached consensus, <sup>a</sup>=proposed by respondents in the first round, <sup>b</sup>=merged with 'mobility' after first round.
