# Supplementary material for: Defining the content of a minimal dataset for acquired brain injury using a Delphi procedure
Source: Springer Nature journal article supplement (doi:10.1186/s12955-020-01286-3), 2020-02-17
Supplement: MOESM2 [file 17715834]

| Measurement instruments   | Yes (%) | Measurement instruments       | Yes (%)          | Measurement instruments      | Yes (%) | Measurement instruments               | Yes (%)                  | Measurement instruments | Yes (%) | Measurement instruments | Yes (%) |
|---------------------------|---------|-------------------------------|------------------|------------------------------|---------|---------------------------------------|--------------------------|-------------------------|---------|-------------------------|---------|
| Disease characteristics   |         | Body functions and structures |                  | Activities and participation |         | Environmental factors                 |                          | Personal factors        |         | Other                   |         |
| Injury characteristics    |         | Cognitive functioning         |                  | Mobility                     |         | Social support                        |                          | Demographics            |         | Quality of life         |         |
| Date of brain injury      | 91.1*   | MOCA                          | 89.7*            | FAC                          | 85.7*   | MSPSS                                 | 76.9*                    | Age                     | 82.2*   | LiSat-9                 | 81.3*   |
| Type of brain injury      | 88.9*   | CFQ                           | 55.2*            | MI                           | 81.3*   | SSL                                   | 57.9*                    | Sex                     | 82.2*   | SF-12                   | 77.8*   |
| Previous brain injury     | 86.7*   | <b>Emotional functioning</b>  |                  | BBS                          | 72.2*   | <b>Services, systems and policies</b> |                          | Living situation        | 80.0*   | EQ-5D                   | 75.0*   |
| Discharge destination     | 64.4*   |                               | HADS             | 82.2*                        | 10MWT   |                                       | 68.4*                    | General practitioner    | 48.9    | Marital status          | 60.0*   |
| Duration of hospital stay | 53.3*   | NPI-Q                         | 69.7*            | TGUG                         | 66.7*   | Medication                            | 48.9                     | Children                | 53.3*   | SF-36                   | 69.2*   |
| GCS                       | 48.9    | <b>Energy</b>                 |                  | <b>Communication</b>         |         | Physical therapist                    | 42.2                     | Socioeconomic status    | 44.4    | SWLS                    | 50.0    |
| ICD-10                    | 40.0    |                               | FSS              |                              | 83.9*   | Instrument query                      | 40.5                     | Psychologist            | 42.2    | Ethnicity               | 40.0    |
| RLAS                      | 13.3    | BFI                           | 41.2             | <b>Participation</b>         |         | Home care                             | 42.2                     | <b>Coping</b>           |         |                         |         |
| <b>Comorbidity</b>        |         | <b>Pain</b>                   |                  |                              | USER-P  | 82.8*                                 | Speech therapist         |                         | 40.0    | UPCC                    | 55.2*   |
|                           | CIRS    |                               | 76.2**           | VAS                          | 95.0**  | CIQ                                   | 72.2*                    | Occupational therapist  | 37.8    |                         |         |
| LMV                       | 46.7    | <b>Sensory functioning</b>    |                  | FAI                          | 63.2*   | Hospital admittance                   | 37.8                     |                         |         |                         |         |
| CCI                       | 30.8    |                               | Instrument query | 38.5                         | IPA     | 41.2                                  | Rehabilitation care      | 37.8                    |         |                         |         |
|                           |         |                               |                  | <b>Self-care</b>             |         | Medical officer                       | 33.3                     |                         |         |                         |         |
|                           |         |                               |                  |                              | BI      | 87.5*                                 | Outpatient hospital care | 31.1                    |         |                         |         |
|                           |         |                               |                  |                              | KIADL   | 60.0*                                 | Living facilities        | 31.1                    |         |                         |         |
|                           |         |                               |                  |                              | mRS     | 45.5                                  | Social work              | 28.9                    |         |                         |         |

|     |      |                                |      |
|-----|------|--------------------------------|------|
| IPA | 33.3 | First aid                      | 24.4 |
|     |      | Dietician                      | 17.8 |
|     |      | Homoeopathist                  | 11.1 |
|     |      | <b>Products and technology</b> |      |
|     |      | Mobility aids                  | 48.9 |
|     |      | Walking aids                   | 48.9 |
|     |      | Communication aids             | 37.8 |
|     |      | Hearing aid                    | 31.1 |
|     |      | Braces                         | 28.9 |
|     |      | Glasses                        | 26.7 |
|     |      | Bathroom aids                  | 22.2 |

*Note.* GCS; Glasgow Coma Scale, ICD-10; International Classification of Diseases -10, RLAS; Ranchos Los Amigos Scale, CIRS; Cumulative Illness Rating Scale, LMV; Landelijke Monitor Volksgezondheid, CCI; Charlson Comorbidity Index, MOCA; Montreal Cognitive Assessment, CFQ; Cognitive Failure Questionnaire, HADS; Hospital Anxiety and Depression scale, NPI-Q; Neuropsychiatric Inventory-Questionnaire, FSS; Fatigue Severity Scale, BFI; Brief Fatigue Inventory, VAS; Visual Analogue Scale, FAC; Functional Ambulation Categories, MI; Motricity Index, BBS; Berg Balance Scale, 10MWT; 10 Minute Walk Test, TGUG; Timed Get Up and Go, USER-P; Utrecht Scale for Evaluation of Rehabilitation-Participation, CIQ; Community Integration Questionnaire, FAI; Frenchay Activity Index, IPA; Impact on Participation and Autonomy, BI; Barthel Index, KIADL; Katz Index of Activities of Daily Living, mRS; modified Rankin Scale, MSPSS; Multidimensional Scale of Perceived Social Support, SSL; Social Support List, UPCC; Utrecht Proactive Coping Competence scale, LiSat; Life Satisfaction Questionnaire, SF-12; 12-Item Short Form Health Survey, EQ-5D; EuroQol-5 dimensions, WHOQOL-BREF; World Health Organization Quality of Life Questionnaire-BREF, SF-36; 36-Item Short Form Health Survey, SWLS; Satisfaction With Life Scale. \* = Rated as a suitable instrument for the concerned domain by the majority of respondents. \*\* = Only instrument for the concerned domain that reached consensus.
