# Supplementary material for: Defining the content of a minimal dataset for acquired brain injury using a Delphi procedure
Source: Springer Nature journal article supplement (doi:10.1186/s12955-020-01286-3), 2020-02-17
Supplement: MOESM3 [file 17715834]

| Domain                                                                                                         | Yes (%) |
|----------------------------------------------------------------------------------------------------------------|---------|
| <b>Cognitive functioning</b>                                                                                   |         |
| MoCa                                                                                                           | 68.6*   |
| CFQ                                                                                                            | 2.9     |
| Both                                                                                                           | 28.6    |
| <b>Emotional functioning</b>                                                                                   |         |
| HADS                                                                                                           | 57.6*   |
| NPI-Q                                                                                                          | 15.2    |
| Both                                                                                                           | 27.3    |
| <b>Injury characteristics</b>                                                                                  |         |
| <b>Do you agree with the definitions for 'duration of hospital stay' and 'discharge destination'?</b>          |         |
| Yes                                                                                                            | 90.6*   |
| No                                                                                                             | 9.4     |
| <b>Communication</b>                                                                                           |         |
| <b>There is no instrument that met the preconditions. Should this domain still be included in the MDS-ABI?</b> |         |
| Yes, with a screening question                                                                                 | 85.7*   |
| Yes and I know a suitable instrument:                                                                          | 8.6     |
| No                                                                                                             | 5.7     |

*Note.* Montreal Cognitive Assessment, CFQ; Cognitive Failure Questionnaire, HADS; Hospital Anxiety and Depression scale, NPI-Q; Neuropsychiatric Inventory-Questionnaire. \* = Reached consensus.
