# Supplementary material for: Defining the content of a minimal dataset for acquired brain injury using a Delphi procedure
Source: Springer Nature journal article supplement (doi:10.1186/s12955-020-01286-3), 2020-02-17
Supplement: MOESM4 [file 17715834]

| Question                                                                                                                                                 | Yes (%) |
|----------------------------------------------------------------------------------------------------------------------------------------------------------|---------|
| <b>What variable should be included?</b>                                                                                                                 |         |
| Duration of hospital stay                                                                                                                                | 5       |
| Discharge destination                                                                                                                                    | 22.5    |
| Both                                                                                                                                                     | 62.5*   |
| None                                                                                                                                                     | 10      |
| <b>Do you agree with the proposed screening question for communication?</b>                                                                              |         |
| Yes                                                                                                                                                      | 89.5*   |
| No                                                                                                                                                       | 10.5    |
| <b>Should we drop the FAC in order to bypass the overlap between mobility and self-care?</b>                                                             |         |
| Yes                                                                                                                                                      | 82.8*   |
| No                                                                                                                                                       | 17.2    |
| <b>Do you prefer the newly proposed screening question for social support over the question that was proposed by a respondent in round 2?</b>            |         |
| Yes                                                                                                                                                      | 82.4*   |
| No                                                                                                                                                       | 17.6    |
| <b>The content of the measurement instruments that were selected for participation and QoL overlap. What measures should be included in the MDS-ABI?</b> |         |
| USER-P for participation and SF-12 for QoL                                                                                                               | 48.4    |
| USER-P for both participation and QoL                                                                                                                    | 38.7    |
| USER-P for participation and LiSat for QoL                                                                                                               | 12.9    |

*Note.* USER-P; Utrecht Scale for Evaluation of Rehabilitation-Participation, LiSat; Life Satisfaction Questionnaire, SF-12; 12-Item Short Form Health Survey, QoL; Quality of Life. \* = Reached consensus.
